# Supplementary material for: A Perfusion Bioreactor for Longitudinal Monitoring of Bioengineered Liver Constructs
Source: PubMed Central journal article supplement (PMC7912543; doi:10.3390/nano11020275), 2021-01-21
Supplement: nanomaterials-11-00275-s001.pdf [file nanomaterials-11-00275-s001.pdf]

## Supplementary materials

**Supplementary Table S1: CNC machine setting for the realization of the chambers.** The same settings were used for realization of both chambers. Two ‘projects’ were realized, one 3D and one 2D. “Tool Diameter” is the diameter of the tool used for the printing; “Step Over” is the spatial increase from right to left; “Step Down” is that of lowering; “Feed Rate” is the spatial movement from right to left; “Plunge Rate” from top to bottom; “Tolerance” and “Allowance” refer to the accuracy of implementation.

|                      | External Pathway (3D project) |                 | Internal Pathway (2D project) |
|----------------------|-------------------------------|-----------------|-------------------------------|
|                      | Roughing                      | Finishing       |                               |
| <b>Tool diameter</b> | 6 mm (end mill)               | 6 mm (end mill) | 6 mm (end mill)               |
| <b>Step over</b>     | 0.1 mm                        | 0.2 mm          | 0.1 mm                        |
| <b>Step down</b>     | 1 mm                          | 0.2 mm          | 1 mm                          |
| <b>Feed rate</b>     | 40 mm/min                     | 40 mm/min       | 40 mm/min                     |
| <b>Plunge rate</b>   | 10 mm/min                     | 10 mm/min       | 10 mm/min                     |
| <b>Spindle rate</b>  | 10000 rpm                     | 10000 rpm       | 10000 rpm                     |
| <b>Tolerance</b>     | 0.1 mm                        | 0.001 mm        | 0.1 mm                        |
| <b>Allowance</b>     | 0.5 mm                        | 0 mm            | 0.5 mm                        |

**Supplementary Table S2: Primary Antibodies.** List of the primary antibodies used for immunofluorescence.

| Antigen          | Company       | Cat.No.  | Dilution |
|------------------|---------------|----------|----------|
| Albumin          | Abcam         | ab106582 | 1/200    |
| Cytokeratin 18   | Dako          | M7010    | 1/100    |
| Cleaved Caspase3 | CellSignaling | 9661     | 1:100    |
| Cytochrome 3A4   | GeneTex       | GTX60577 | 1:500    |
| KI67             | Abcam         | ab15580  | 1:500    |

**Supplementary Table S3: qPCR probes.** List of Taqman qPCR probes used in the study (all from Integrated DNA Technologies, IDT).

| Gene Name | RefSeq Number | IDT Assay Name     |
|-----------|---------------|--------------------|
| ACTB      | NM_001101     | Hs.PT.39a.22214847 |
| ALB       | NM_000477(1)  | Hs.PT.56a.1501965  |
| CDH1      | NM_004360     | Hs.PT.58.3324071   |
| CYP1A2    | NM_000761(1)  | Hs.PT.58.45671878  |
| CYP3A4    | NM_017460     | Hs.PT.58.1272782   |

|          |              |                    |
|----------|--------------|--------------------|
| FOXA2    | NM_153675    | Hs.PT.58.22972176  |
| HNF4A    | NM_178850    | Hs.PT.58.22303533  |
| HPRT1    | NM_000194    | Hs.PT.58v.45621572 |
| MKI76    | NM_002417    | Hs.PT.58.27920212  |
| SERPINA1 | NM_001127702 | Hs.PT.58.2013281   |
| UGT1A1   | NM_000463(1) | Hs.PT.58.40269971  |
